# Supplementary material
Source: PubMed Central journal article supplement (PMC9898472)
Supplement: NIHMS1827638-supplement-supinfo2.pdf [file NIHMS1827638-supplement-supinfo2.pdf]

**Manuscript Title: Phytochemical compound PB125 attenuates skeletal muscle mitochondrial dysfunction and impaired proteostasis in a preclinical model of musculoskeletal decline**

Robert V. Musci, Kendra M. Andrie, Maureen A. Walsh, Zackary Valenti, Melissa A. Linden, Maryam F. Afzali, Sydney Bork, Margaret Campbell, Taylor Johnson, Thomas E. Kail, Richard Martinez, Tessa Nguyen, Joseph Sanford, Sara Wist, Meredith D. Murrell, Joe M. McCord, Brooks M. Hybertson, Qian Zhang, Martin A. Javors, Kelly S. Santangelo, Karyn L. Hamilton

**Authors:**  
**Animal model used, if applicable:** Guinea pig – Dunkin Hartley Guinea pig

**Underlying hypothesis:** This study tests the hypothesis that 10 months of PB125 supplementation would attenuate the age/disease related declines in skeletal muscle of Hartley guinea pigs, particularly the declines in mitochondrial respiration and protein synthesis. We were additionally interested in testing the hypothesis that attenuation of the declines in mitochondrial respiration and protein synthesis would yield to maintained mobility in Hartley guinea pigs as their musculoskeletal dysfunction progressed.

- Definitions of 'n':**
- Q1 The number of guinea pigs. Weekly measurements of weight were used to generate growth curves from all guinea pigs.
  - Q2 Refers to averaged technical duplicates acquired from biological sample (permeabilized soleus myofibers). Samples were excluded if CCF was beyond cutoff. Outlier test used to remove any outliers. Refer to methods for details of exclusion.
  - Q3 Refers to averaged technical duplicates acquired from biological sample (permeabilized soleus myofibers). Samples were excluded if CCF was beyond cutoff. Outlier test used to remove any outliers. Refer to methods for details of exclusion.
  - Q4 Refers to averaged technical duplicates acquired from biological sample (permeabilized soleus myofibers). Samples were excluded if CCF was beyond cutoff. Outlier test used to remove any outliers. Refer to methods for details of exclusion.
  - Q5 Refers to averaged technical duplicates acquired from biological sample (permeabilized soleus myofibers). Samples were excluded if CCF was beyond cutoff. Outlier test used to remove any outliers. Refer to methods for details of exclusion.
  - Q6 Refers to averaged technical duplicates acquired from biological sample (permeabilized soleus myofibers). Samples were excluded if CCF was beyond cutoff. Outlier test used to remove any outliers. Refer to methods for details of exclusion.
  - Q7 Fractionated skeletal muscle tissue of guinea pigs.
  - Q8 Fractionated skeletal muscle tissue of guinea pigs.
  - Q9 Fractionated skeletal muscle tissue of guinea pigs.
  - Q10 Homogenized skeletal muscle tissue of subset of guinea pigs
  - Q11 Homogenized skeletal muscle tissue of subset of guinea pigs
  - Q12 The number of guinea pigs that were part of the long term study (excludes guinea pigs that died prematurely).

| Experimental Question #                                                   | Finding Conclusion                                                                     | Experimental location/variable          | Summary Statistics (Mean, SD, n) |                                                                                   |                                           |                   |                                                                                          |                                                  |                |                                                                                   |                                               |            |                                                                                          |                                            | Units  | Statistical test                                                | Any other variable                                                                                                              | Figure/table in which data are presented | Comments                                         |
|---------------------------------------------------------------------------|----------------------------------------------------------------------------------------|-----------------------------------------|----------------------------------|-----------------------------------------------------------------------------------|-------------------------------------------|-------------------|------------------------------------------------------------------------------------------|--------------------------------------------------|----------------|-----------------------------------------------------------------------------------|-----------------------------------------------|------------|------------------------------------------------------------------------------------------|--------------------------------------------|--------|-----------------------------------------------------------------|---------------------------------------------------------------------------------------------------------------------------------|------------------------------------------|--------------------------------------------------|
|                                                                           | The rate of growth was not different between treated and untreated male guinea pigs.   | Rate of growth (K)                      | K values                         |                                                                                   | CON:0.0870<br>6                           | 95% CI            | CON:                                                                                     | 0.07213 – 0.                                     |                | DFd: 1120                                                                         | (reflects data points used to generate curve) |            | k                                                                                        | CON vs PB125                               |        | Fig 1F                                                          | Growth rates (k) were calculated by weekly measurements of mass for each guinea pig over the 10 month period (reflected by DFd) |                                          |                                                  |
|                                                                           |                                                                                        |                                         | PB125:0.08314                    |                                                                                   | PB125:                                    | 0.06939 – 0.09784 |                                                                                          | 28 animals                                       | p value 0.7151 |                                                                                   |                                               |            |                                                                                          |                                            |        |                                                                 |                                                                                                                                 |                                          |                                                  |
|                                                                           | The rate of growth was not different between treated and untreated female guinea pigs. | Rate of growth (K)                      | K values                         |                                                                                   | CON:0.0766<br>7                           | 95% CI            | CON:                                                                                     | 0.06170 – 0.09263                                |                | DFd: 1049                                                                         | (reflects data points used to generate curve) |            | k                                                                                        | CON vs PB125                               |        | Fig 1G                                                          | Growth rates (k) were calculated by weekly measurements of mass for each guinea pig over the 10 month period (reflected by DFd) |                                          |                                                  |
|                                                                           |                                                                                        |                                         | PB125:0.07244                    |                                                                                   | PB125:                                    | 0.05027 – 0.09687 |                                                                                          | 28 animals                                       | 0.7593         |                                                                                   |                                               |            |                                                                                          |                                            |        |                                                                 |                                                                                                                                 |                                          |                                                  |
| 1. Is growth or size different between treated and untreated guinea pigs? | Body mass was not different between treated and untreated guinea pigs                  | Body mass                               | Summary Statistics (Mean, SD, n) |                                                                                   |                                           |                   |                                                                                          |                                                  |                |                                                                                   |                                               |            |                                                                                          |                                            | grams  | Three Way ANOVA<br>Age: <0.0001, Sex: <0.0001 Treatment: 0.7693 | Fig 1H                                                                                                                          |                                          |                                                  |
|                                                                           |                                                                                        |                                         | 5mo                              | Male CON                                                                          |                                           |                   | Male PB125                                                                               |                                                  |                | Female CON                                                                        |                                               |            | Female PB125                                                                             |                                            |        |                                                                 |                                                                                                                                 |                                          |                                                  |
|                                                                           |                                                                                        |                                         |                                  | Mean                                                                              | SD                                        | n                 | Mean                                                                                     | SD                                               | n              | Mean                                                                              | SD                                            | n          | Mean                                                                                     | SD                                         |        |                                                                 |                                                                                                                                 |                                          | n                                                |
|                                                                           |                                                                                        |                                         | 15mo                             | 933                                                                               | 71.9355772                                | 12                | 929.454545                                                                               | 71.3755751                                       | 11             | 768                                                                               | 62.3409977                                    | 11         | 765.833333                                                                               | 75.9591198                                 |        |                                                                 |                                                                                                                                 |                                          | 12                                               |
|                                                                           |                                                                                        |                                         |                                  | 1174.83333                                                                        | 151.659207                                | 12                | 1205.8                                                                                   | 93.5043671                                       | 10             | 1002.6                                                                            | 98.6894118                                    | 10         | 1000.8                                                                                   | 84.9441647                                 |        |                                                                 |                                                                                                                                 |                                          | 10                                               |
|                                                                           |                                                                                        |                                         | 5mo                              | Relative soleus mass was not different between treated and untreated guinea pigs. |                                           |                   | Relative gastrocnemius mass was not different between treated and untreated guinea pigs. |                                                  |                | Relative soleus mass was not different between treated and untreated guinea pigs. |                                               |            | Relative gastrocnemius mass was not different between treated and untreated guinea pigs. |                                            |        |                                                                 |                                                                                                                                 |                                          | relative mass (muscle mass [mg] / body mass [g]) |
| 5mo                                                                       | Soleus mass divided by body mass                                                       |                                         |                                  | Gastrocnemius mass divided by body mass                                           |                                           |                   | Soleus mass divided by body mass                                                         |                                                  |                | Gastrocnemius mass divided by body mass                                           |                                               |            |                                                                                          |                                            |        |                                                                 |                                                                                                                                 |                                          |                                                  |
|                                                                           | 15mo                                                                                   | 0.22714667                              | 0.03191312                       | 12                                                                                | 0.22068909                                | 0.03623283        | 11                                                                                       | 0.23381091                                       | 0.04446527     | 11                                                                                | 0.2355475                                     | 0.04152482 | 12                                                                                       |                                            |        |                                                                 |                                                                                                                                 |                                          |                                                  |
| 0.22258333                                                                |                                                                                        | 0.04945789                              | 12                               | 0.20233333                                                                        | 0.04960847                                | 9                 | 0.23033333                                                                               | 0.05332917                                       | 9              | 0.2031                                                                            | 0.03058122                                    | 10         |                                                                                          |                                            |        |                                                                 |                                                                                                                                 |                                          |                                                  |
| 5mo                                                                       | Gastrocnemius mass was not different between treated and untreated guinea pigs.        |                                         |                                  | Relative soleus mass was not different between treated and untreated guinea pigs. |                                           |                   | Relative gastrocnemius mass was not different between treated and untreated guinea pigs. |                                                  |                | Relative soleus mass was not different between treated and untreated guinea pigs. |                                               |            | relative mass (muscle mass [mg] / body mass [g])                                         | Age: 0.0050, Sex: 0.558, Treatment: 0.5781 | Fig 1J |                                                                 |                                                                                                                                 |                                          |                                                  |
|                                                                           | 5mo                                                                                    | Gastrocnemius mass divided by body mass |                                  |                                                                                   | Relative soleus mass divided by body mass |                   |                                                                                          | Relative gastrocnemius mass divided by body mass |                |                                                                                   | Relative soleus mass divided by body mass     |            |                                                                                          |                                            |        |                                                                 |                                                                                                                                 |                                          |                                                  |
| 15mo                                                                      |                                                                                        | 1.9676675                               | 0.1261685                        | 12                                                                                | 1.99459                                   | 0.2061759         | 11                                                                                       | 2.01765364                                       | 0.1972424      | 11                                                                                | 2.031985                                      | 0.17281013 | 12                                                                                       |                                            |        |                                                                 |                                                                                                                                 |                                          |                                                  |
|                                                                           | 1.85941667                                                                             | 0.20458404                              | 12                               | 1.90322222                                                                        | 0.23644808                                | 9                 | 1.88288889                                                                               | 0.17785629                                       | 9              | 1.89                                                                              | 0.19404581                                    | 10         |                                                                                          |                                            |        |                                                                 |                                                                                                                                 |                                          |                                                  |

| Experimental Question #                                                                                      | Finding Conclusion                                                                                                                | Experimental location/variable                                                                                                 | Summary Statistics (Mean, SD, n)  |            |            |            |            |            |            |            |            |              |            |            | Units                                            | Statistical test                                 | Any other variable                               | Figure/table in which data are presented    | Comments                                         |                                                  |                                             |        |
|--------------------------------------------------------------------------------------------------------------|-----------------------------------------------------------------------------------------------------------------------------------|--------------------------------------------------------------------------------------------------------------------------------|-----------------------------------|------------|------------|------------|------------|------------|------------|------------|------------|--------------|------------|------------|--------------------------------------------------|--------------------------------------------------|--------------------------------------------------|---------------------------------------------|--------------------------------------------------|--------------------------------------------------|---------------------------------------------|--------|
|                                                                                                              |                                                                                                                                   |                                                                                                                                | Male CON                          |            |            | Male PB125 |            |            | Female CON |            |            | Female PB125 |            |            |                                                  |                                                  |                                                  |                                             |                                                  | Three Way ANOVA                                  |                                             |        |
|                                                                                                              |                                                                                                                                   |                                                                                                                                | Mean                              | SD         | n          | Mean       | SD         | n          | Mean       | SD         | n          | Mean         | SD         | n          |                                                  |                                                  |                                                  |                                             |                                                  |                                                  |                                             |        |
| 2. Are there Disease/Age-, Sex-, and Treatment related effects on skeletal muscle mitochondrial respiration? | There are significant main effects of disease/age and sex on State 3 mitochondrial respiration, but not treatment.                | Permeabilized myofibers of soleus                                                                                              | 5mo                               | 99.5276958 | 18.66274   | 12         | 97.5147423 | 23.4106458 | 13         | 88.5799643 | 14.0457714 | 14           | 98.7043107 | 16.6658579 | 14                                               | oxygen consumption (pmol O <sub>2</sub> /(mg*s)) | Age: 0.0012, Sex: 0.0057, Treatment: 0.0979      | Fig 3A                                      |                                                  |                                                  |                                             |        |
|                                                                                                              |                                                                                                                                   |                                                                                                                                | 15mo                              | 85.8028571 | 24.9938572 | 14         | 97.4923077 | 24.7245415 | 13         | 70.4323077 | 16.9556216 | 13           | 77.3766667 | 21.585462  | 12                                               |                                                  |                                                  |                                             |                                                  |                                                  |                                             |        |
|                                                                                                              |                                                                                                                                   | Permeabilized myofibers of soleus                                                                                              | 5mo                               | 107.410796 | 17.3659599 | 13         | 107.471711 | 23.9735865 | 14         | 95.6786929 | 12.1086217 | 14           | 108.909382 | 16.7000258 | 14                                               |                                                  |                                                  |                                             | oxygen consumption (pmol O <sub>2</sub> /(mg*s)) | Age: 0.0038, Sex: 0.0018, Treatment: 0.0369      | Fig 3B                                      |        |
|                                                                                                              |                                                                                                                                   |                                                                                                                                | 15mo                              | 95.3414286 | 28.2551403 | 14         | 111.15     | 22.079589  | 13         | 80.2938462 | 20.1534776 | 13           | 85.1191667 | 20.7205377 | 12                                               |                                                  |                                                  |                                             |                                                  |                                                  |                                             |        |
|                                                                                                              | Permeabilized myofibers of soleus                                                                                                 | 5mo                                                                                                                            | 72.3387346                        | 13.1018151 | 13         | 71.8934643 | 12.2785257 | 14         | 64.8530143 | 10.183499  | 14         | 68.6162786   | 9.4492954  | 14         | oxygen consumption (pmol O <sub>2</sub> /(mg*s)) | Age: <0.0001, Sex: 0.0015, Treatment: 0.3686     | Fig 3C                                           |                                             |                                                  |                                                  |                                             |        |
|                                                                                                              |                                                                                                                                   | 15mo                                                                                                                           | 56.0421429                        | 10.7295983 | 14         | 61.02      | 13.0105521 | 13         | 49.1330769 | 12.814388  | 13         | 49.035       | 11.9533864 | 12         |                                                  |                                                  |                                                  |                                             |                                                  |                                                  |                                             |        |
|                                                                                                              | Permeabilized myofibers of soleus                                                                                                 | 5mo                                                                                                                            | 13.7375241                        | 2.92464774 | 11         | 12.4175548 | 5.91692153 | 12         | 11.6563386 | 3.50597489 | 13         | 14.1583086   | 4.77056906 | 13         | Ratio                                            | Age: 0.0117, Sex: 0.5763, Treatment: 0.4027      | Fig 3D                                           |                                             |                                                  |                                                  |                                             |        |
|                                                                                                              |                                                                                                                                   | 15mo                                                                                                                           | 11.164983                         | 5.84144599 | 14         | 11.0785241 | 4.47831446 | 13         | 9.34990257 | 2.24577659 | 13         | 11.2413266   | 4.35138311 | 12         |                                                  |                                                  |                                                  |                                             |                                                  |                                                  |                                             |        |
|                                                                                                              | 3. Are there Disease/Age-, Sex-, and Treatment related effects on fatty acid supported skeletal muscle mitochondrial respiration? | There are no effects of disease/age and sex on State 3 fatty acid supported mitochondrial respiration with 0.5 mM ADP present. | Permeabilized myofibers of soleus | 5mo        | 42.0946167 | 5.53852908 | 6          | 36.3777    | 10.5266758 | 7          | 37.3601167 | 2.43270933   | 6          | 39.6061389 | 5.43781586                                       | 9                                                | oxygen consumption (pmol O <sub>2</sub> /(mg*s)) | Age: 0.8125, Sex: 0.5343, Treatment: 0.8930 | Fig 3E                                           |                                                  |                                             |        |
|                                                                                                              |                                                                                                                                   |                                                                                                                                |                                   | 15mo       | 41.1203136 | 7.47993877 | 11         | 39.1209091 | 8.20109926 | 11         | 35.255     | 6.91944493   | 12         | 41.75      | 10.6846307                                       | 7                                                |                                                  |                                             |                                                  |                                                  |                                             |        |
|                                                                                                              |                                                                                                                                   |                                                                                                                                | Permeabilized myofibers of soleus | 5mo        | 44.0325636 | 8.13458713 | 11         | 50.6090962 | 13.2921892 | 13         | 42.0969409 | 3.45188836   | 11         | 45.1631321 | 6.86170343                                       | 14                                               |                                                  |                                             |                                                  | oxygen consumption (pmol O <sub>2</sub> /(mg*s)) | Age: 0.8789, Sex: 0.1205, Treatment: 0.0349 | Fig 3F |
|                                                                                                              |                                                                                                                                   |                                                                                                                                |                                   | 15mo       | 46.9315636 | 9.22131165 | 11         | 45.7272727 | 5.37350926 | 11         | 40.0916667 | 8.23578537   | 12         | 47.9957143 | 13.228866                                        | 7                                                |                                                  |                                             |                                                  |                                                  |                                             |        |
| Permeabilized myofibers of soleus                                                                            |                                                                                                                                   | 5mo                                                                                                                            | 62.0050864                        | 7.80694986 | 11         | 63.8228385 | 18.9146688 | 13         | 53.6398455 | 5.84251776 | 11         | 62.0279929   | 10.281103  | 14         | oxygen consumption (pmol O <sub>2</sub> /(mg*s)) | Age: 0.1584, Sex: 0.0695, Treatment: 0.0773      | Fig 3G                                           |                                             |                                                  |                                                  |                                             |        |
|                                                                                                              |                                                                                                                                   | 15mo                                                                                                                           | 58.5307682                        | 12.2325652 | 11         | 59.38      | 10.6120177 | 11         | 50.0083333 | 13.3945415 | 12         | 58.2357143   | 16.7850676 | 7          |                                                  |                                                  |                                                  |                                             |                                                  |                                                  |                                             |        |



| 6. Does PB125 treatment modulate disease/age-related changes in mitochondrial respiration? Are there any sex specific effects?                | 3 respiration.                    | 15mo PB125 | 87.84 24.9 25 |                                                   |                                                   | O2/(mg*s)  |            |         | 5mo CON vs. 15mo PB125 |            |    | 0.5358                                            |                       |        | Fig 4D                              |                     |        |                       |         |        |
|-----------------------------------------------------------------------------------------------------------------------------------------------|-----------------------------------|------------|---------------|---------------------------------------------------|---------------------------------------------------|------------|------------|---------|------------------------|------------|----|---------------------------------------------------|-----------------------|--------|-------------------------------------|---------------------|--------|-----------------------|---------|--------|
|                                                                                                                                               |                                   |            | Mean          | SD                                                | n                                                 | Mean       | SD         | n       | Mean                   | SD         | n  | Mean                                              | SD                    | n      |                                     |                     |        |                       |         |        |
| PB125 attenuates the age-related decline in State 3 respiration in females only                                                               | permeabilized myofibers of soleus | Male       | 5mo CON       |                                                   |                                                   | 15mo CON   |            |         | 15mo PB125             |            |    | Two-Way ANOVA Dunnett's multiple comparisons test |                       |        | oxygen consumption (pmol O2/(mg*s)) | 5mo CON vs 15mo CON | 0.1633 | PB125 5mo CON vs 15mo | 0.9554  |        |
|                                                                                                                                               |                                   |            | Mean          | SD                                                | n                                                 | Mean       | SD         | n       | Mean                   | SD         | n  | 5mo CON vs 15mo CON                               | 5mo CON vs 15mo PB125 | 0.0463 |                                     |                     |        |                       |         | 0.2898 |
|                                                                                                                                               |                                   |            | 99.5276958    | 18.66274                                          | 12                                                | 85.8028571 | 24.9938572 | 14      | 97.4923077             | 24.7245415 | 13 |                                                   |                       |        |                                     |                     |        |                       |         |        |
|                                                                                                                                               |                                   | Female     | Mean          | SD                                                | n                                                 | Mean       | SD         | n       | Mean                   | SD         | n  | 5mo CON vs 15mo CON                               | 5mo CON vs 15mo PB125 | 0.0463 |                                     |                     |        |                       |         | 0.2898 |
|                                                                                                                                               |                                   |            | 88.5799643    | 14.0457714                                        | 14                                                | 70.4323077 | 16.9556216 | 13      | 77.3766667             | 21.585462  | 12 |                                                   |                       |        |                                     |                     |        |                       |         |        |
|                                                                                                                                               |                                   |            |               |                                                   |                                                   |            |            |         |                        |            |    |                                                   |                       |        |                                     |                     |        |                       |         |        |
|                                                                                                                                               | 5mo CON                           | Mean       | SD            | n                                                 | One-Way ANOVA Dunnett's multiple comparisons test |            |            | p value |                        |            |    |                                                   |                       |        |                                     |                     |        |                       |         |        |
|                                                                                                                                               |                                   | 101.3      | 15.75         | 27                                                |                                                   |            |            |         |                        |            |    |                                                   |                       |        |                                     |                     |        |                       |         |        |
|                                                                                                                                               |                                   |            |               |                                                   |                                                   |            |            |         |                        |            |    |                                                   |                       |        |                                     |                     |        |                       |         |        |
|                                                                                                                                               | 15mo CON                          | Mean       | SD            | n                                                 | One-Way ANOVA Dunnett's multiple comparisons test |            |            | p value |                        |            |    |                                                   |                       |        |                                     |                     |        |                       |         |        |
|                                                                                                                                               |                                   | 88.1       | 25.4          | 27                                                |                                                   |            |            |         |                        |            |    |                                                   |                       |        |                                     |                     |        |                       |         |        |
|                                                                                                                                               |                                   |            |               |                                                   |                                                   |            |            |         |                        |            |    |                                                   |                       |        |                                     |                     |        |                       |         |        |
| 15mo PB125                                                                                                                                    | Mean                              | SD         | n             | One-Way ANOVA Dunnett's multiple comparisons test |                                                   |            | p value    |         |                        |            |    |                                                   |                       |        |                                     |                     |        |                       |         |        |
|                                                                                                                                               | 98.66                             | 24.83      | 25            |                                                   |                                                   |            |            |         |                        |            |    |                                                   |                       |        |                                     |                     |        |                       |         |        |
|                                                                                                                                               |                                   |            |               |                                                   |                                                   |            |            |         |                        |            |    |                                                   |                       |        |                                     |                     |        |                       |         |        |
| PB125 does not attenuate the disease/age related decline in ETS capacity (because there was not a significant decline in ETS capacity in this | permeabilized myofibers of soleus | Male       | 5mo CON       |                                                   |                                                   | 15mo CON   |            |         | 15mo PB125             |            |    | Two-Way ANOVA Dunnett's multiple comparisons test |                       |        | oxygen consumption (pmol O2/(mg*s)) | 5mo CON vs 15mo CON | 0.2314 | PB125 5mo CON vs 15mo | 0.8467  |        |
|                                                                                                                                               |                                   |            | Mean          | SD                                                | n                                                 | Mean       | SD         | n       | Mean                   | SD         | n  | 5mo CON vs 15mo CON                               | 5mo CON vs 15mo PB125 | 0.1052 |                                     |                     |        |                       |         | 0.3354 |
|                                                                                                                                               |                                   |            | 107.410796    | 17.3659599                                        | 13                                                | 95.3414286 | 28.2551403 | 14      | 111.308462             | 22.192122  | 13 |                                                   |                       |        |                                     |                     |        |                       |         |        |
|                                                                                                                                               |                                   | Female     | Mean          | SD                                                | n                                                 | Mean       | SD         | n       | Mean                   | SD         | n  | 5mo CON vs 15mo CON                               | 5mo CON vs 15mo PB125 | 0.1052 |                                     |                     |        |                       |         | 0.3354 |
|                                                                                                                                               |                                   |            | 95.6786929    | 12.1086217                                        | 14                                                | 80.2938462 | 20.1534776 | 13      | 85.1191667             | 20.7205377 | 12 |                                                   |                       |        |                                     |                     |        |                       |         |        |
|                                                                                                                                               |                                   |            |               |                                                   |                                                   |            |            |         |                        |            |    |                                                   |                       |        |                                     |                     |        |                       |         |        |
|                                                                                                                                               | 5mo CON                           | Mean       | SD            | n                                                 | One-Way ANOVA Dunnett's multiple comparisons test |            |            | p value |                        |            |    |                                                   |                       |        |                                     |                     |        |                       |         |        |
|                                                                                                                                               |                                   | 68.46      | 12.07         | 27                                                |                                                   |            |            |         |                        |            |    |                                                   |                       |        |                                     |                     |        |                       |         |        |
|                                                                                                                                               |                                   |            |               |                                                   |                                                   |            |            |         |                        |            |    |                                                   |                       |        |                                     |                     |        |                       |         |        |
|                                                                                                                                               | 15mo CON                          | Mean       | SD            | n                                                 | One-Way ANOVA Dunnett's multiple comparisons test |            |            | p value |                        |            |    |                                                   |                       |        |                                     |                     |        |                       |         |        |
|                                                                                                                                               |                                   | 52.72      | 12.07         | 27                                                |                                                   |            |            |         |                        |            |    |                                                   |                       |        |                                     |                     |        |                       |         |        |
|                                                                                                                                               |                                   |            |               |                                                   |                                                   |            |            |         |                        |            |    |                                                   |                       |        |                                     |                     |        |                       |         |        |
| 15mo PB125                                                                                                                                    | Mean                              | SD         | n             | One-Way ANOVA Dunnett's multiple comparisons test |                                                   |            | p value    |         |                        |            |    |                                                   |                       |        |                                     |                     |        |                       |         |        |
|                                                                                                                                               | 55.27                             | 13.69      | 25            |                                                   |                                                   |            |            |         |                        |            |    |                                                   |                       |        |                                     |                     |        |                       |         |        |
|                                                                                                                                               |                                   |            |               |                                                   |                                                   |            |            |         |                        |            |    |                                                   |                       |        |                                     |                     |        |                       |         |        |
| PB125 does not sex specifically attenuate the age-related decline in ETS capacity (CII - CIV)                                                 | permeabilized myofibers of soleus | Male       | 5mo CON       |                                                   |                                                   | 15mo CON   |            |         | 15mo PB125             |            |    | Two-Way ANOVA Dunnett's multiple comparisons test |                       |        | oxygen consumption (pmol O2/(mg*s)) | 5mo CON vs 15mo CON | 0.0014 | PB125 5mo CON vs 15mo | 0.0345  |        |
|                                                                                                                                               |                                   |            | Mean          | SD                                                | n                                                 | Mean       | SD         | n       | Mean                   | SD         | n  | 5mo CON vs 15mo CON                               | 5mo CON vs 15mo PB125 | 0.0021 |                                     |                     |        |                       |         | 0.0025 |
|                                                                                                                                               |                                   |            | 72.3387346    | 13.1018151                                        | 13                                                | 56.0421429 | 10.7295983 | 14      | 61.02                  | 13.0105521 | 13 |                                                   |                       |        |                                     |                     |        |                       |         |        |
|                                                                                                                                               |                                   | Female     | Mean          | SD                                                | n                                                 | Mean       | SD         | n       | Mean                   | SD         | n  | 5mo CON vs 15mo CON                               | 5mo CON vs 15mo PB125 | 0.0021 |                                     |                     |        |                       |         | 0.0025 |
|                                                                                                                                               |                                   |            | 64.8530143    | 10.183499                                         | 14                                                | 49.1330769 | 12.814388  | 13      | 49.035                 | 11.9533864 | 12 |                                                   |                       |        |                                     |                     |        |                       |         |        |
|                                                                                                                                               |                                   |            |               |                                                   |                                                   |            |            |         |                        |            |    |                                                   |                       |        |                                     |                     |        |                       |         |        |
|                                                                                                                                               | 5mo CON                           | Mean       | SD            | n                                                 | One-Way ANOVA Dunnett's multiple comparisons test |            |            | p value |                        |            |    |                                                   |                       |        |                                     |                     |        |                       |         |        |
|                                                                                                                                               |                                   | 12.61      | 3.555         | 24                                                |                                                   |            |            |         |                        |            |    |                                                   |                       |        |                                     |                     |        |                       |         |        |
|                                                                                                                                               |                                   |            |               |                                                   |                                                   |            |            |         |                        |            |    |                                                   |                       |        |                                     |                     |        |                       |         |        |
|                                                                                                                                               | 15mo CON                          | Mean       | SD            | n                                                 | One-Way ANOVA Dunnett's multiple comparisons test |            |            | p value |                        |            |    |                                                   |                       |        |                                     |                     |        |                       |         |        |
|                                                                                                                                               |                                   | 9.708      | 3.391         | 26                                                |                                                   |            |            |         |                        |            |    |                                                   |                       |        |                                     |                     |        |                       |         |        |
|                                                                                                                                               |                                   |            |               |                                                   |                                                   |            |            |         |                        |            |    |                                                   |                       |        |                                     |                     |        |                       |         |        |
| 15mo PB125                                                                                                                                    | Mean                              | SD         | n             | One-Way ANOVA Dunnett's multiple comparisons test |                                                   |            | p value    |         |                        |            |    |                                                   |                       |        |                                     |                     |        |                       |         |        |
|                                                                                                                                               | 11.16                             | 4.326      | 25            |                                                   |                                                   |            |            |         |                        |            |    |                                                   |                       |        |                                     |                     |        |                       |         |        |
|                                                                                                                                               |                                   |            |               |                                                   |                                                   |            |            |         |                        |            |    |                                                   |                       |        |                                     |                     |        |                       |         |        |
| PB125 attenuates the disease/age related decline in RCR                                                                                       | permeabilized myofibers of soleus | Male       | 5mo CON       |                                                   |                                                   | 15mo CON   |            |         | 15mo PB125             |            |    | Two-Way ANOVA Dunnett's multiple comparisons test |                       |        | ratio                               | 5mo CON vs 15mo CON | 0.0356 | PB125 5mo CON vs 15mo | 0.01516 |        |
|                                                                                                                                               |                                   |            | Mean          | SD                                                | n                                                 | Mean       | SD         | n       | Mean                   | SD         | n  | 5mo CON vs 15mo CON                               | 5mo CON vs 15mo PB125 | 0.2093 |                                     |                     |        |                       |         | 0.9458 |
|                                                                                                                                               |                                   |            | 13.7375241    | 2.92464774                                        | 11                                                | 10.0654575 | 4.31627083 | 13      | 11.0785241             | 4.47831446 | 13 |                                                   |                       |        |                                     |                     |        |                       |         |        |
|                                                                                                                                               |                                   | Female     | Mean          | SD                                                | n                                                 | Mean       | SD         | n       | Mean                   | SD         | n  | 5mo CON vs 15mo CON                               | 5mo CON vs 15mo PB125 | 0.2093 |                                     |                     |        |                       |         | 0.9458 |
|                                                                                                                                               |                                   |            | 11.6563386    | 3.50597489                                        | 13                                                | 9.34990257 | 2.24577659 | 13      | 11.2413266             | 4.35138311 | 12 |                                                   |                       |        |                                     |                     |        |                       |         |        |
|                                                                                                                                               |                                   |            |               |                                                   |                                                   |            |            |         |                        |            |    |                                                   |                       |        |                                     |                     |        |                       |         |        |
|                                                                                                                                               | 5mo                               | Mean       | SD            | n                                                 | One-Way ANOVA Dunnett's multiple comparisons test |            |            | p value |                        |            |    |                                                   |                       |        |                                     |                     |        |                       |         |        |
|                                                                                                                                               |                                   | 2.22549538 | 0.1338218     | 13                                                |                                                   |            |            |         |                        |            |    |                                                   |                       |        |                                     |                     |        |                       |         |        |
|                                                                                                                                               |                                   |            |               |                                                   |                                                   |            |            |         |                        |            |    |                                                   |                       |        |                                     |                     |        |                       |         |        |
|                                                                                                                                               | 15mo                              | Mean       | SD            | n                                                 | One-Way ANOVA Dunnett's multiple comparisons test |            |            | p value |                        |            |    |                                                   |                       |        |                                     |                     |        |                       |         |        |
|                                                                                                                                               |                                   | 2.09324976 | 0.18108292    | 14                                                |                                                   |            |            |         |                        |            |    |                                                   |                       |        |                                     |                     |        |                       |         |        |
|                                                                                                                                               |                                   |            |               |                                                   |                                                   |            |            |         |                        |            |    |                                                   |                       |        |                                     |                     |        |                       |         |        |

| Experimental Question # | Finding Conclusion                                                                           | Experimental location/variable            | Summary Statistics (Mean, SD, n) |            |            |              |            |    |            |            |    |            |            | Units | Statistical test                  | Any other variable                          | Figure/table in which data are presented | Comments |  |
|-------------------------|----------------------------------------------------------------------------------------------|-------------------------------------------|----------------------------------|------------|------------|--------------|------------|----|------------|------------|----|------------|------------|-------|-----------------------------------|---------------------------------------------|------------------------------------------|----------|--|
|                         | there is a significant effect of disease/age on myofibrillar protein synthesis in the soleus | Myofibrillar subfraction of Soleus muscle | Male CON                         | Male PB125 | Female CON | Female PB125 |            |    |            |            |    |            |            |       | Three Way ANOVA                   |                                             |                                          | Fig 5A   |  |
|                         |                                                                                              |                                           | Mean                             | SD         | n          | Mean         | SD         | n  | Mean       | SD         | n  | Mean       | SD         | n     | fractional synthesis rate (%/day) | Age: 0.0015, Sex: 0.5587, Treatment: 0.4982 |                                          |          |  |
|                         |                                                                                              |                                           | 2.22549538                       | 0.1338218  | 13         | 2.27587718   | 0.16137748 | 13 | 2.34915667 | 0.26437344 | 14 | 2.22320641 | 0.18728575 | 13    |                                   |                                             |                                          |          |  |
|                         |                                                                                              |                                           | 2.09324976                       | 0.18108292 | 14         | 2.20301389   | 0.18551335 | 12 | 2.12306806 | 0.16032488 | 12 | 2.18618639 | 0.12621223 | 12    |                                   |                                             |                                          |          |  |

| 7. Are there Disease/Age-, Sex-, and Treatment related effects on skeletal muscle protein synthesis? | There is a significant effect of disease/age on mitochondrial protein synthesis in the soleus        | Mitochondrial subfraction of Soleus muscle        | 5mo  | Mean       | SD         | n  | fractional synthesis rate (%/day) | Age: 0.0029, Sex: 0.7811, Treatment: 0.3887  | Fig 5B |
|------------------------------------------------------------------------------------------------------|------------------------------------------------------------------------------------------------------|---------------------------------------------------|------|------------|------------|----|------------|------------|----|------------|------------|----|------------|------------|----|-----------------------------------|----------------------------------------------|--------|
|                                                                                                      |                                                                                                      |                                                   |      | 1.7374618  | 0.21034142 | 13 | 1.72790714 | 0.16061741 | 14 | 1.7425441  | 0.23958803 | 13 | 1.80200905 | 0.30720095 | 14 |                                   |                                              |        |
|                                                                                                      |                                                                                                      |                                                   | 15mo | 1.59909881 | 0.19148393 | 14 | 1.69472095 | 0.19286796 | 12 | 1.57687806 | 0.18026636 | 12 | 1.5874975  | 0.30541418 | 12 |                                   |                                              |        |
|                                                                                                      | There is a significant effect of disease/age on cytosolic protein synthesis in the soleus            | Cytosolic subfraction of Soleus muscle            | 5mo  | 2.31875462 | 0.1373844  | 13 | 2.39275643 | 0.20134459 | 14 | 2.42844222 | 0.1795843  | 12 | 2.43478262 | 0.35830419 | 14 | fractional synthesis rate (%/day) | Age: <0.0001, Sex: 0.1457, Treatment: 0.2072 | Fig 5C |
|                                                                                                      |                                                                                                      |                                                   | 15mo | 2.15263571 | 0.14790641 | 14 | 2.22183778 | 0.16792303 | 12 | 2.2020925  | 0.19777053 | 12 | 2.25817139 | 0.12983812 | 12 |                                   |                                              |        |
|                                                                                                      | There is a significant effect of disease/age on Collagen protein synthesis in the soleus             | Collagen subfraction of Soleus muscle             | 5mo  | 0.91436128 | 0.23069098 | 13 | 0.97412077 | 0.40340964 | 13 | 0.95704513 | 0.43079109 | 13 | 0.81466718 | 0.20758125 | 13 | fractional synthesis rate (%/day) | Age: <0.0001, Sex: 0.4539, Treatment: 0.8824 | Fig 5D |
|                                                                                                      |                                                                                                      |                                                   | 15mo | 0.6040056  | 0.31295196 | 14 | 0.59454028 | 0.28731824 | 12 | 0.49936389 | 0.21940987 | 12 | 0.6284425  | 0.33627904 | 12 |                                   |                                              |        |
|                                                                                                      | There is a significant effect of disease/age on myofibrillar protein synthesis in the gastrocnemius  | Myofibrillar subfraction of gastrocnemius muscle  | 5mo  | 1.93359333 | 0.14684657 | 13 | 1.99464857 | 0.15391676 | 14 | 1.96200154 | 0.13141966 | 13 | 1.99989103 | 0.3017671  | 13 | fractional synthesis rate (%/day) | Age: <0.0001, Sex: 0.9541, Treatment: 0.4042 | Fig 5E |
|                                                                                                      |                                                                                                      |                                                   | 15mo | 1.71260976 | 0.13716658 | 14 | 1.73493436 | 0.15787186 | 12 | 1.70658614 | 0.18465984 | 12 | 1.6994478  | 0.07726639 | 12 |                                   |                                              |        |
|                                                                                                      | There is a significant effect of disease/age on mitochondrial protein synthesis in the gastrocnemius | Mitochondrial subfraction of gastrocnemius muscle | 5mo  | 1.88033974 | 0.13536286 | 13 | 1.89296846 | 0.18749823 | 13 | 1.83008461 | 0.14552234 | 13 | 1.89414026 | 0.31656624 | 13 | fractional synthesis rate (%/day) | Age: <0.0001, Sex: 0.9226, Treatment: 0.9433 | Fig 5F |
|                                                                                                      |                                                                                                      |                                                   | 15mo | 1.69435933 | 0.17251916 | 14 | 1.6289415  | 0.12684399 | 12 | 1.68996803 | 0.16671628 | 12 | 1.66856568 | 0.06898468 | 12 |                                   |                                              |        |
|                                                                                                      | There is a significant effect of disease/age on cytosolic protein synthesis in the gastrocnemius     | Cytosolic subfraction of gastrocnemius muscle     | 5mo  | 2.00498769 | 0.13776247 | 13 | 2.08004821 | 0.14146105 | 13 | 2.14378051 | 0.22920456 | 13 | 2.15360048 | 0.29833302 | 14 | fractional synthesis rate (%/day) | Age: <0.0001, Sex: 0.1948, Treatment: 0.4439 | Fig 5G |
|                                                                                                      |                                                                                                      |                                                   | 15mo | 1.81458095 | 0.11138432 | 14 | 1.82554111 | 0.19333809 | 12 | 1.80076306 | 0.16847819 | 12 | 1.8164975  | 0.07900233 | 12 |                                   |                                              |        |
|                                                                                                      | There is a significant effect of disease/age on collagen protein synthesis in the gastrocnemius      | Collagen subfraction of gastrocnemius muscle      | 5mo  | 1.46383154 | 0.22666781 | 13 | 1.52458881 | 0.41531949 | 14 | 1.52812897 | 0.23259949 | 13 | 1.56839128 | 0.41492193 | 13 | fractional synthesis rate (%/day) | Age: <0.0001, Sex: 0.2064, Treatment: 0.5310 | Fig 5H |
|                                                                                                      |                                                                                                      |                                                   | 15mo | 1.14150524 | 0.2450633  | 14 | 1.06753111 | 0.32596463 | 12 | 1.29843417 | 0.17711874 | 12 | 1.11631778 | 0.35655402 | 12 |                                   |                                              |        |

| Experimental Question #                                                                                              | Finding Conclusion                        | Experimental location/variable | Summary Statistics (Mean, SD, n) |            |    |                                   |                                                   |    |            |            |                      |                                                   | Units                  | Statistical test  | Any other variable                | Figure/table in which data are presented | Comments |                   |        |        |        |
|----------------------------------------------------------------------------------------------------------------------|-------------------------------------------|--------------------------------|----------------------------------|------------|----|-----------------------------------|---------------------------------------------------|----|------------|------------|----------------------|---------------------------------------------------|------------------------|-------------------|-----------------------------------|------------------------------------------|----------|-------------------|--------|--------|--------|
| PB125 treatment attenuates the age related decline in FSR in the myofibrillar fraction of the soleus                 | Myofibrillar subfraction of Soleus muscle | 5mo CON                        | Mean                             | SD         | n  | fractional synthesis rate (%/day) | One-Way ANOVA Dunnett's multiple comparisons test |    |            | p value    | 5mo CON vs. 15mo CON | 0.0021                                            | 5mo CON vs. 15mo PB125 | 0.2566            | fractional synthesis rate (%/day) | 5mo CON vs 15mo CON                      | 0.0769   | PB125 vs 15mo CON | 0.9201 | Fig 6A |        |
|                                                                                                                      |                                           | 15mo CON                       | 2.107                            | 0.1691     | 26 |                                   |                                                   |    |            |            |                      |                                                   |                        |                   |                                   |                                          |          |                   |        |        |        |
|                                                                                                                      |                                           | 15mo PB125                     | 2.195                            | 0.1554     | 24 |                                   |                                                   |    |            |            |                      |                                                   |                        |                   |                                   |                                          |          |                   |        |        |        |
| PB125 treatment attenuates the age related decline in FSR in the myofibrillar fraction of the soleus in females only | Myofibrillar subfraction of Soleus muscle | Male                           | Mean                             | SD         | n  | Mean                              | SD                                                | n  | Mean       | SD         | n                    | Two-Way ANOVA Dunnett's multiple comparisons test |                        |                   | fractional synthesis rate (%/day) | 5mo CON vs 15mo CON                      | 0.0769   | PB125 vs 15mo CON | 0.9201 | Fig 6B |        |
|                                                                                                                      |                                           | 5mo CON                        | 2.22549538                       | 0.1338218  | 13 | 2.09324976                        | 0.18108292                                        | 14 | 2.20301389 | 0.18551335 | 12                   | 5mo CON vs 15mo CON                               | 0.0769                 | PB125 vs 15mo CON |                                   |                                          |          |                   |        |        | 0.9201 |
|                                                                                                                      |                                           | Female                         | 2.29895667                       | 0.19364181 | 13 | 2.12306806                        | 0.16032488                                        | 12 | 2.18618639 | 0.12621223 | 12                   | 5mo CON vs 15mo CON                               | 0.019                  | PB125 vs 15mo CON |                                   |                                          |          |                   |        |        | 0.1661 |
| PB125 treatment attenuates the age related decline in FSR in the mitochondrial fraction of the soleus                | Myofibrillar subfraction of Soleus muscle | 5mo CON                        | Mean                             | SD         | n  | fractional synthesis rate (%/day) | One-Way ANOVA Dunnett's multiple comparisons test |    |            | p value    | 5mo CON vs. 15mo CON | 0.0299                                            | 5mo CON vs. 15mo PB125 | 0.2051            | fractional synthesis rate (%/day) | 5mo CON vs 15mo CON                      | 0.0769   | PB125 vs 15mo CON | 0.9201 | Fig 6C |        |
|                                                                                                                      |                                           | 15mo CON                       | 1.589                            | 0.183      | 26 |                                   |                                                   |    |            |            |                      |                                                   |                        |                   |                                   |                                          |          |                   |        |        |        |
|                                                                                                                      |                                           | 15mo PB125                     | 1.641                            | 0.2557     | 24 |                                   |                                                   |    |            |            |                      |                                                   |                        |                   |                                   |                                          |          |                   |        |        |        |

| 8. Does PB125 treatment modulate disease/age-related changes in protein synthesis in the soleus? Are there any sex specific effects? | PB125 treatment attenuates the age related decline in FSR in the mitochondrial fraction of the                                              | Mitochondrial subfraction of Soleus muscle       | 5mo CON    |            |    | 15mo CON                                          |                        |    | 15mo PB125 |            |    | Two-Way ANOVA Dunnett's multiple comparisons test |                     |                       |         | Fig 6D |
|--------------------------------------------------------------------------------------------------------------------------------------|---------------------------------------------------------------------------------------------------------------------------------------------|--------------------------------------------------|------------|------------|----|---------------------------------------------------|------------------------|----|------------|------------|----|---------------------------------------------------|---------------------|-----------------------|---------|--------|
|                                                                                                                                      |                                                                                                                                             |                                                  | Mean       | SD         | n  | Mean                                              | SD                     | n  | Mean       | SD         | n  | fractional synthesis rate (%/day)                 | 5mo CON vs 15mo CON | 5mo CON vs 15mo PB125 | p value |        |
| Male                                                                                                                                 |                                                                                                                                             |                                                  | 1.7374618  | 0.21034142 | 13 | 1.59909881                                        | 0.19148393             | 14 | 1.69472095 | 0.19286796 | 12 | 0.1948                                            | 0.1221              | 0.8481                | 0.1546  |        |
|                                                                                                                                      |                                                                                                                                             |                                                  | 1.7425441  | 0.23958803 | 13 | 1.57687806                                        | 0.18026636             | 12 | 1.5874975  | 0.30541418 | 12 |                                                   |                     |                       |         |        |
|                                                                                                                                      |                                                                                                                                             |                                                  |            |            |    |                                                   |                        |    |            |            |    |                                                   |                     |                       |         |        |
| Female                                                                                                                               |                                                                                                                                             |                                                  | 2.371      | 0.1654     | 25 | One-Way ANOVA Dunnett's multiple comparisons test |                        |    | p value    |            |    | 0.0123                                            | 0.0002              | 0.0265                | 0.0158  |        |
|                                                                                                                                      |                                                                                                                                             |                                                  | 2.158      | 0.1479     | 25 | fractional synthesis rate (%/day)                 | 5mo CON vs. 15mo CON   |    | <0.0001    |            |    |                                                   |                     |                       |         |        |
|                                                                                                                                      |                                                                                                                                             |                                                  | 2.24       | 0.148      | 24 |                                                   | 5mo CON vs. 15mo PB125 |    | 0.0075     |            |    |                                                   |                     |                       |         |        |
| Male                                                                                                                                 | PB125 treatment does not attenuate the age related decline in FSR in the cytosolic fraction of the soleus when pooling male and female mice | Cytosolic subfraction of Soleus muscle           | 2.31875462 | 0.1373844  | 13 | 2.15263571                                        | 0.14790641             | 14 | 2.22183778 | 0.16792303 | 12 | 0.0123                                            | 0.0002              | 0.0265                | 0.0158  |        |
|                                                                                                                                      |                                                                                                                                             |                                                  | 2.42844222 | 0.1795843  | 12 | 2.16412727                                        | 0.15491472             | 11 | 2.25817139 | 0.12983812 | 12 |                                                   |                     |                       |         |        |
|                                                                                                                                      |                                                                                                                                             |                                                  |            |            |    |                                                   |                        |    |            |            |    |                                                   |                     |                       |         |        |
| Female                                                                                                                               |                                                                                                                                             |                                                  | 0.9357     | 0.3393     | 26 | One-Way ANOVA Dunnett's multiple comparisons test |                        |    | p value    |            |    | 0.0225                                            | 0.001               | 0.0238                | 0.0199  |        |
|                                                                                                                                      |                                                                                                                                             |                                                  | 0.5557     | 0.2738     | 26 | fractional synthesis rate (%/day)                 | 5mo CON vs. 15mo CON   |    | <0.0001    |            |    |                                                   |                     |                       |         |        |
|                                                                                                                                      |                                                                                                                                             |                                                  | 0.6115     | 0.3064     | 24 |                                                   | 5mo CON vs. 15mo PB125 |    | 0.0008     |            |    |                                                   |                     |                       |         |        |
| Male                                                                                                                                 | PB125 treatment does not attenuate the age related decline in FSR in the collagen fraction of the soleus                                    | Collagen subfraction of Soleus muscle            | 0.91436128 | 0.23069098 | 13 | 0.6040056                                         | 0.31295196             | 14 | 0.59454028 | 0.28731824 | 12 | 0.0225                                            | 0.001               | 0.0238                | 0.0199  |        |
|                                                                                                                                      |                                                                                                                                             |                                                  | 0.95704513 | 0.43079109 | 13 | 0.49936389                                        | 0.21940987             | 12 | 0.6284425  | 0.33627904 | 12 |                                                   |                     |                       |         |        |
|                                                                                                                                      |                                                                                                                                             |                                                  |            |            |    |                                                   |                        |    |            |            |    |                                                   |                     |                       |         |        |
| Female                                                                                                                               |                                                                                                                                             |                                                  | 1.948      | 0.1373     | 26 | One-Way ANOVA Dunnett's multiple comparisons test |                        |    | p value    |            |    | 0.0003                                            | 0.0001              | 0.0017                | 0.0001  |        |
|                                                                                                                                      |                                                                                                                                             |                                                  | 1.71       | 0.1575     | 26 | fractional synthesis rate (%/day)                 | 5mo CON vs. 15mo CON   |    | <0.0001    |            |    |                                                   |                     |                       |         |        |
|                                                                                                                                      |                                                                                                                                             |                                                  | 1.717      | 0.1229     | 24 |                                                   | 5mo CON vs. 15mo PB125 |    | <0.0001    |            |    |                                                   |                     |                       |         |        |
| Male                                                                                                                                 | PB125 treatment does not attenuate the age related decline in FSR in the myofibrillar fraction of the                                       | Myofibrillar subfraction of gastrocnemius muscle | 1.93359333 | 0.14684657 | 13 | 1.71260976                                        | 0.13716658             | 14 | 1.73493436 | 0.15787186 | 12 | 0.0003                                            | 0.0001              | 0.0017                | 0.0001  |        |
|                                                                                                                                      |                                                                                                                                             |                                                  | 1.96200154 | 0.13141966 | 13 | 1.70658614                                        | 0.18465984             | 12 | 1.6994478  | 0.07726639 | 12 |                                                   |                     |                       |         |        |
|                                                                                                                                      |                                                                                                                                             |                                                  |            |            |    |                                                   |                        |    |            |            |    |                                                   |                     |                       |         |        |
| Female                                                                                                                               |                                                                                                                                             |                                                  | 1.855      | 0.1401     | 26 | One-Way ANOVA Dunnett's multiple comparisons test |                        |    | p value    |            |    | 0.0001                                            | 0.0001              | 0.0001                | 0.0001  |        |
|                                                                                                                                      |                                                                                                                                             |                                                  | 1.692      | 0.1665     | 26 | fractional synthesis rate (%/day)                 | 5mo CON vs. 15mo CON   |    | 0.0001     |            |    |                                                   |                     |                       |         |        |
|                                                                                                                                      |                                                                                                                                             |                                                  | 1.649      | 0.1019     | 24 |                                                   | 5mo CON vs. 15mo PB125 |    | <0.0001    |            |    |                                                   |                     |                       |         |        |
| PB125 treatment                                                                                                                      |                                                                                                                                             |                                                  | 5mo CON    |            |    | 15mo CON                                          |                        |    | 15mo PB125 |            |    |                                                   |                     |                       |         |        |

| Experimental Question #                                                                                                                      | Finding Conclusion | Experimental location/variable                   | Summary Statistics (Mean, SD, n) |            |    |                                                   |            |         |            |            |    | Units                             | Statistical test    | Any other variable | Figure/table in which data are presented | Comments |        |
|----------------------------------------------------------------------------------------------------------------------------------------------|--------------------|--------------------------------------------------|----------------------------------|------------|----|---------------------------------------------------|------------|---------|------------|------------|----|-----------------------------------|---------------------|--------------------|------------------------------------------|----------|--------|
| PB125 treatment does not attenuate the age related decline in FSR in the myofibrillar fraction of the                                        |                    | Myofibrillar subfraction of gastrocnemius muscle | 1.948                            | 0.1373     | 26 | One-Way ANOVA Dunnett's multiple comparisons test |            |         | p value    |            |    | fractional synthesis rate (%/day) | 5mo CON vs 15mo CON | 0.0003             | 0.0001                                   | 0.0017   | 0.0001 |
|                                                                                                                                              |                    |                                                  | 1.71                             | 0.1575     | 26 | 5mo CON vs. 15mo CON                              |            | <0.0001 |            |            |    |                                   |                     |                    |                                          |          |        |
|                                                                                                                                              |                    |                                                  | 1.717                            | 0.1229     | 24 | 5mo CON vs. 15mo PB125                            |            | <0.0001 |            |            |    |                                   |                     |                    |                                          |          |        |
| PB125 treatment does not attenuate the age related decline in FSR in the myofibrillar fraction of the gastrocnemius in either male or female |                    | Myofibrillar subfraction of gastrocnemius muscle | 1.93359333                       | 0.14684657 | 13 | 1.71260976                                        | 0.13716658 | 14      | 1.73493436 | 0.15787186 | 12 | fractional synthesis rate (%/day) | 5mo CON vs 15mo CON | 0.0003             | 0.0001                                   | 0.0017   | 0.0001 |
|                                                                                                                                              |                    |                                                  | 1.96200154                       | 0.13141966 | 13 | 1.70658614                                        | 0.18465984 | 12      | 1.6994478  | 0.07726639 | 12 |                                   |                     |                    |                                          |          |        |
|                                                                                                                                              |                    |                                                  |                                  |            |    |                                                   |            |         |            |            |    |                                   |                     |                    |                                          |          |        |
| PB125 treatment attenuates the age related decline in FSR in the mitochondrial fraction of the                                               |                    | Myofibrillar subfraction of gastrocnemius muscle | 1.855                            | 0.1401     | 26 | One-Way ANOVA Dunnett's multiple comparisons test |            |         | p value    |            |    | fractional synthesis rate (%/day) | 5mo CON vs 15mo CON | 0.0001             | 0.0001                                   | 0.0001   | 0.0001 |
|                                                                                                                                              |                    |                                                  | 1.692                            | 0.1665     | 26 | 5mo CON vs. 15mo CON                              |            | 0.0001  |            |            |    |                                   |                     |                    |                                          |          |        |
|                                                                                                                                              |                    |                                                  | 1.649                            | 0.1019     | 24 | 5mo CON vs. 15mo PB125                            |            | <0.0001 |            |            |    |                                   |                     |                    |                                          |          |        |
| PB125 treatment                                                                                                                              |                    |                                                  | 5mo CON                          |            |    | 15mo CON                                          |            |         | 15mo PB125 |            |    |                                   |                     |                    |                                          |          |        |

| 9. Does PB125 treatment modulate disease/age-related changes in protein synthesis in the gastrocnemius? Are there any sex specific effects? | attenuates the age related decline in FSR in the mitochondrial fraction of the soleus in males                                                              | Mitochondrial subfraction of gastrocnemius muscle | Male       |            |    | Female                                            |            |    | fractional synthesis rate (%/day) | Two-Way ANOVA Dunnett's multiple comparisons test |                       |                                                   | Fig 6L              |                       |        |                        |
|---------------------------------------------------------------------------------------------------------------------------------------------|-------------------------------------------------------------------------------------------------------------------------------------------------------------|---------------------------------------------------|------------|------------|----|---------------------------------------------------|------------|----|-----------------------------------|---------------------------------------------------|-----------------------|---------------------------------------------------|---------------------|-----------------------|--------|------------------------|
|                                                                                                                                             |                                                                                                                                                             |                                                   | Mean       | SD         | n  | Mean                                              | SD         | n  |                                   | 5mo CON vs 15mo CON                               | 5mo CON vs 15mo PB125 | 15mo CON vs 15mo PB125                            |                     |                       |        |                        |
|                                                                                                                                             |                                                                                                                                                             |                                                   | 1.88033974 | 0.13536286 | 13 | 1.69435933                                        | 0.17251916 | 14 | 1.6289415                         | 0.12684399                                        | 12                    | 0.0021                                            | <0.0001             |                       |        |                        |
|                                                                                                                                             |                                                                                                                                                             |                                                   | 1.83008461 | 0.14552234 | 13 | 1.68996803                                        | 0.16671628 | 12 | 1.66856568                        | 0.06898468                                        | 12                    | 0.0294                                            | 0.0108              |                       |        |                        |
|                                                                                                                                             | PB125 treatment does not attenuate the age related decline in FSR in the cytosolic fraction of the soleus when pooling male and female guinea pigs together | Cytosolic subfraction of gastrocnemius muscle     | Mean       | SD         | n  | One-Way ANOVA Dunnett's multiple comparisons test |            |    | p value                           |                                                   |                       | Fig 6M                                            |                     |                       |        |                        |
|                                                                                                                                             |                                                                                                                                                             |                                                   | 2.074      | 0.1983     | 26 | 5mo CON vs. 15mo CON                              |            |    | <0.0001                           |                                                   |                       |                                                   |                     |                       |        |                        |
|                                                                                                                                             |                                                                                                                                                             |                                                   | 1.808      | 0.1378     | 26 | 5mo CON vs. 15mo PB125                            |            |    | <0.0001                           |                                                   |                       |                                                   |                     |                       |        |                        |
|                                                                                                                                             |                                                                                                                                                             |                                                   | 1.821      | 0.1445     | 24 | 5mo CON vs. 15mo PB125                            |            |    | <0.0001                           |                                                   |                       |                                                   |                     |                       |        |                        |
|                                                                                                                                             | PB125 treatment attenuates the age related decline in FSR in the cytosolic fraction of the soleus in males only                                             | Cytosolic subfraction of gastrocnemius muscle     | 5mo CON    |            |    | 15mo CON                                          |            |    | 15mo PB125                        |                                                   |                       | Two-Way ANOVA Dunnett's multiple comparisons test |                     |                       | Fig 6N |                        |
|                                                                                                                                             |                                                                                                                                                             |                                                   | Mean       | SD         | n  | Mean                                              | SD         | n  | Mean                              | SD                                                | n                     | fractional synthesis rate (%/day)                 | 5mo CON vs 15mo CON | 5mo CON vs 15mo PB125 |        | 15mo CON vs 15mo PB125 |
|                                                                                                                                             |                                                                                                                                                             |                                                   | 2.00498769 | 0.13776247 | 13 | 1.81458095                                        | 0.11138432 | 14 | 1.82554111                        | 0.19333809                                        | 12                    | 0.0058                                            | 0.0058              | 0.0131                |        |                        |
|                                                                                                                                             |                                                                                                                                                             |                                                   | 2.14378051 | 0.22920456 | 13 | 1.80076306                                        | 0.16847819 | 12 | 1.8164975                         | 0.07900233                                        | 12                    | <0.0001                                           | <0.0001             | <0.0001               |        |                        |
|                                                                                                                                             | PB125 treatment does not attenuate the age related decline in FSR in the collagen fraction of the soleus                                                    | Collagen subfraction of gastrocnemius muscle      | Mean       | SD         | n  | One-Way ANOVA Dunnett's multiple comparisons test |            |    | p value                           |                                                   |                       | Fig 6O                                            |                     |                       |        |                        |
|                                                                                                                                             |                                                                                                                                                             |                                                   | 1.496      | 0.2274     | 26 | 5mo CON vs. 15mo CON                              |            |    | 0.0005                            |                                                   |                       |                                                   |                     |                       |        |                        |
|                                                                                                                                             |                                                                                                                                                             |                                                   | 1.214      | 0.2267     | 26 | 5mo CON vs. 15mo PB125                            |            |    | <0.0001                           |                                                   |                       |                                                   |                     |                       |        |                        |
|                                                                                                                                             |                                                                                                                                                             |                                                   | 1.092      | 0.335      | 24 | 5mo CON vs. 15mo PB125                            |            |    | <0.0001                           |                                                   |                       |                                                   |                     |                       |        |                        |
|                                                                                                                                             | PB125 treatment does not attenuate the age related decline in FSR in the collagen fraction of the soleus in either males or females                         | Collagen subfraction of gastrocnemius muscle      | 5mo CON    |            |    | 15mo CON                                          |            |    | 15mo PB125                        |                                                   |                       | Two-Way ANOVA Dunnett's multiple comparisons test |                     |                       | Fig 6P |                        |
|                                                                                                                                             |                                                                                                                                                             |                                                   | Mean       | SD         | n  | Mean                                              | SD         | n  | Mean                              | SD                                                | n                     | fractional synthesis rate (%/day)                 | 5mo CON vs 15mo CON | 5mo CON vs 15mo PB125 |        | 15mo CON vs 15mo PB125 |
|                                                                                                                                             |                                                                                                                                                             |                                                   | 1.46383154 | 0.22666781 | 13 | 1.14150524                                        | 0.2450633  | 14 | 1.06753111                        | 0.32596463                                        | 12                    | 0.0047                                            | 0.0047              | 0.0008                |        |                        |
|                                                                                                                                             |                                                                                                                                                             |                                                   | 1.52812897 | 0.23259949 | 13 | 1.29843417                                        | 0.17711874 | 12 | 1.11631778                        | 0.35655402                                        | 12                    | 0.0636                                            | 0.0636              | 0.0005                |        |                        |

| Experimental Question #                                                                                       | Finding Conclusion                                                                                                                                                                                                                                                                                                                        | Experimental location/variable | Summary Statistics (Mean, SD, n) |            |            |            |            |            |            |            |            |              | Units      | Statistical test | Any other variable | Figure/table in which data are presented | Comments                                                        |        |  |    |
|---------------------------------------------------------------------------------------------------------------|-------------------------------------------------------------------------------------------------------------------------------------------------------------------------------------------------------------------------------------------------------------------------------------------------------------------------------------------|--------------------------------|----------------------------------|------------|------------|------------|------------|------------|------------|------------|------------|--------------|------------|------------------|--------------------|------------------------------------------|-----------------------------------------------------------------|--------|--|----|
| 10. Are there Disease/Age-, Sex-, and Treatment related effects on Nr12 or HO-1 content in the gastrocnemius? | There are significant effects of Disease/Age and Treatment, but not Sex, on Nr12 content in the gastrocnemius. There is a significant interaction between Disease/Age and Treatment. There is a significant interaction between Disease/Age and Treatment on HO-1 protein content in the gastrocnemius, but no main effect of any factor. | Homogenized gastrocnemius      | Male CON                         |            |            | Male PB125 |            |            | Female CON |            |            | Female PB125 |            |                  | Arbitrary units    | Three Way ANOVA                          | Age: 0.0250, Sex: 0.5069, Treatment: 0.0270, Age x Trt: <0.0001 | Fig 7A |  |    |
|                                                                                                               |                                                                                                                                                                                                                                                                                                                                           |                                | 5mo                              | Mean       | SD         | n          | Mean       | SD         | n          | Mean       | SD         | n            | Mean       | SD               |                    |                                          |                                                                 |        |  | n  |
|                                                                                                               |                                                                                                                                                                                                                                                                                                                                           |                                |                                  | 0.99999992 | 0.23115772 | 12         | 1.25295275 | 0.31956989 | 12         | 1.12621233 | 0.22878589 | 12           | 1.32893917 | 0.31560442       |                    |                                          |                                                                 |        |  | 12 |
|                                                                                                               |                                                                                                                                                                                                                                                                                                                                           |                                | 15mo                             | Mean       | SD         | n          | Mean       | SD         | n          | Mean       | SD         | n            | Mean       | SD               |                    |                                          |                                                                 |        |  | n  |
|                                                                                                               |                                                                                                                                                                                                                                                                                                                                           |                                |                                  | 1.66123992 | 0.45560936 | 12         | 1.05320842 | 0.34607459 | 12         | 1.64818992 | 0.70433508 | 12           | 1.07813308 | 0.32795079       |                    |                                          |                                                                 |        |  | 12 |
|                                                                                                               |                                                                                                                                                                                                                                                                                                                                           |                                | 5mo                              | Mean       | SD         | n          | Mean       | SD         | n          | Mean       | SD         | n            | Mean       | SD               |                    |                                          |                                                                 |        |  | n  |
| 1                                                                                                             | 0.24490753                                                                                                                                                                                                                                                                                                                                | 9                              |                                  | 1.67908289 | 0.64069604 | 9          | 1.25892978 | 0.39100794 | 9          | 1.65851622 | 0.91520416 | 9            |            |                  |                    |                                          |                                                                 |        |  |    |
| 15mo                                                                                                          | Mean                                                                                                                                                                                                                                                                                                                                      | SD                             | n                                | Mean       | SD         | n          | Mean       | SD         | n          | Mean       | SD         | n            |            |                  |                    |                                          |                                                                 |        |  |    |
|                                                                                                               | 2.330179                                                                                                                                                                                                                                                                                                                                  | 1.10079732                     | 9                                | 1.13138967 | 0.69051276 | 9          | 2.15458922 | 1.28148039 | 9          | 1.00671233 | 0.60616972 | 9            |            |                  |                    |                                          |                                                                 |        |  |    |
|                                                                                                               | There are no effects of                                                                                                                                                                                                                                                                                                                   |                                | Male CON                         |            |            | Male PB125 |            |            | Female CON |            |            | Female PB125 |            |                  | Arbitrary units    | Three Way ANOVA                          |                                                                 |        |  |    |

|                                                                                                                              |                                                                                                                  |                                         |      |                                                     |            |   |                    |            |   |                                                                |            |   |                                 |            |                                                         |                 |                                                                |        |
|------------------------------------------------------------------------------------------------------------------------------|------------------------------------------------------------------------------------------------------------------|-----------------------------------------|------|-----------------------------------------------------|------------|---|--------------------|------------|---|----------------------------------------------------------------|------------|---|---------------------------------|------------|---------------------------------------------------------|-----------------|----------------------------------------------------------------|--------|
| 11. Are there Disease/Age-, Sex-, and Treatment related effects on carbonyl content in the soleus or gastrocnemius ?         | Disease/Age, Treatment, or Sex, on carbonyl content in the soleus. There was a significant Sex x Age interaction | Homogenized soleus                      | 5mo  | 1                                                   | 0.25154744 | 6 | 1.092113           | 0.1105629  | 6 | 1.12699967                                                     | 0.09041707 | 6 | 1.16333067                      | 0.10674212 | 6                                                       | Arbitrary units | Age: 0.3032, Sex: 0.6274, Treatment: 0.9812, Age x Sex: 0.0069 | Fig 7C |
|                                                                                                                              |                                                                                                                  |                                         | 15mo | 1.20697333                                          | 0.08339618 | 6 | 1.211697           | 0.13721804 | 6 | 1.1378355                                                      | 0.16632006 | 6 | 1.00069025                      | 0.05576008 | 4                                                       |                 |                                                                |        |
|                                                                                                                              | There are no effects of Disease/Age, Treatment, or Sex, on carbonyl content in the gastrocnemius.                | Homogenized gastrocnemius               | 5mo  | Mean                                                | SD         | n | Mean               | SD         | n | Mean                                                           | SD         | n | Mean                            | SD         | n                                                       | Arbitrary units | Age: 0.0814, Sex: 0.9667, Treatment: 0.1179                    | Fig 7D |
|                                                                                                                              |                                                                                                                  |                                         | 15mo | 1.2                                                 | 0.32426597 | 5 | 1.74343667         | 1.28779756 | 6 | 1.16942083                                                     | 0.42427076 | 6 | 2.93925883                      | 1.81713991 | 6                                                       |                 |                                                                |        |
| 12. Does PB125 treatment slow the progression of disability in either male or female guinea pigs? (as defined by a cessation | PB125 does not slow the loss of mobility in male guinea pigs                                                     | Voluntary movement in an enclosed area. |      | Survival curve CON Males: 14<br>PB125 Males: 12     |            |   | Chi square 0.05886 |            |   | Median Survival Ratio (A/B) 1.176<br>95% CI<br>0.4127 – 3.354  |            |   | Cessation of voluntary movement |            | Gehan-Breslow-Wilcoxon test CON vs PB125 P value 0.8083 | Fig 7E          |                                                                |        |
|                                                                                                                              | PB125 does not slow the loss of mobility in female guinea pigs                                                   | Voluntary movement in an enclosed area. |      | Survival curve CON Females: 12<br>PB125 Females: 12 |            |   | Chi square 0.05800 |            |   | Median Survival Ratio (A/B) 0.5714<br>95% CI<br>0.2175 – 1.501 |            |   | Cessation of voluntary movement |            | Gehan-Breslow-Wilcoxon test CON vs PB125 P value 0.4463 | Fig 7F          |                                                                |        |
